# Supplementary material for: Effect of Mavacamten on Chinese Patients With Symptomatic Obstructive Hypertrophic Cardiomyopathy: The EXPLORER-CN Randomized Clinical Trial
Source: PubMed Central journal article supplement — JAMA Cardiol. 2023 Aug 28;8(10):957–65. doi: 10.1001/jamacardio.2023.3030 (PMC10463173; doi:10.1001/jamacardio.2023.3030), 2023-08-28
Supplement: jamacardiol-e233030-s003.pdf [file jamacardiol-e233030-s003.pdf]

## Data Sharing Statement

Tian. Effect of Mavacamten on Chinese Patients With Symptomatic Obstructive Hypertrophic Cardiomyopathy. *JAMA Cardiol.* Published August 28, 2023.

doi:10.1001/jamacardio.2023.3030

### Data

**Data available:** No

### Additional Information

**Explanation for why data not available:** No, due to Human Genetic Resources Administration of China (HGRAC) restriction.
